# Supplementary material
Source: PubMed Central journal article supplement (PMC3976574)
Supplement: Supp_Table1.pdf [file Supp_Table1.pdf]

SUPPLEMENTARY TABLE S1. CHONDROITIN SULFATE/DERMATAN SULFATE (CS/DS) IN NORMAL AND CANCER TISSUES

| <i>Normal tissue # sample</i> | <i>Tri S*</i> | <i>2S4S</i> | <i>2S6S</i> | <i>4S6S</i> | <i>2S*</i> | <i>4S</i> | <i>6S</i> | <i>0S</i> |
|-------------------------------|---------------|-------------|-------------|-------------|------------|-----------|-----------|-----------|
| 1                             | –             | 0.71        | 0.00        | 0.28        | –          | 94.88     | 3.23      | 0.89      |
| 3                             | –             | 1.44        | 0.27        | 0.35        | –          | 89.47     | 7.26      | 1.22      |
| 5                             | –             | 3.54        | 0.32        | 1.38        | –          | 85.13     | 6.92      | 2.54      |
| 7                             | –             | 1.27        | 0.34        | 2.32        | –          | 77.00     | 13.47     | 5.61      |
| 9                             | –             | 4.04        | 0.45        | 0.73        | –          | 87.46     | 3.90      | 3.42      |
| 11                            | –             | 1.35        | 0.12        | 0.43        | –          | 91.43     | 5.70      | 0.96      |
| 13                            | –             | 1.01        | 0.08        | 0.20        | –          | 93.75     | 4.20      | 0.75      |
| 15                            | –             | 0.87        | 0.10        | 0.16        | –          | 93.81     | 4.80      | 0.27      |
| 17                            | –             | 1.84        | 0.17        | 0.49        | –          | 85.63     | 7.48      | 4.40      |
| 19                            | –             | 0.97        | 0.16        | 0.28        | –          | 93.73     | 4.05      | 0.81      |
| Average                       | –             | 1.70        | 0.20        | 0.66        | –          | 89.23     | 6.10      | 2.09      |
| Standard error                | –             | 0.36        | 0.04        | 0.22        | –          | 1.77      | 0.95      | 0.58      |
| <i>Cancer tissue # sample</i> | <i>Tri S*</i> | <i>2S4S</i> | <i>2S6S</i> | <i>4S6S</i> | <i>2S*</i> | <i>4S</i> | <i>6S</i> | <i>0S</i> |
| 2                             | –             | 0.20        | 0.21        | 2.18        | –          | 76.01     | 14.84     | 6.54      |
| 4                             | –             | 0.51        | 0.40        | 2.53        | –          | 70.31     | 21.79     | 4.46      |
| 6                             | –             | 0.77        | 0.49        | 2.35        | –          | 76.43     | 18.89     | 1.08      |
| 8                             | –             | 1.52        | 0.00        | 0.42        | –          | 93.91     | 2.85      | 1.30      |
| 10                            | –             | 0.33        | 0.26        | 1.69        | –          | 73.68     | 21.09     | 2.96      |
| 12                            | –             | 0.20        | 0.35        | 0.87        | –          | 71.97     | 23.61     | 3.00      |
| 14                            | –             | 0.39        | 0.50        | 1.18        | –          | 77.10     | 19.37     | 1.46      |
| 16                            | –             | 0.23        | 0.30        | 1.23        | –          | 62.80     | 31.41     | 4.03      |
| 18                            | –             | 0.44        | 0.43        | 1.32        | –          | 76.49     | 18.64     | 2.68      |
| 20                            | –             | 0.27        | 0.31        | 1.46        | –          | 69.78     | 25.91     | 2.28      |
| Average                       | –             | 0.49        | 0.32        | 1.52        | –          | 74.85     | 19.84     | 2.98      |
| Standard error                | –             | 0.13        | 0.05        | 0.21        | –          | 2.53      | 2.37      | 0.53      |

\*, not detected.
