# Supplementary material
Source: PubMed Central journal article supplement (PMC3976574)
Supplement: Supp_Table2.pdf [file Supp_Table2.pdf]

SUPPLEMENTARY TABLE S2. HEPARAN SULFATE (HS) IN NORMAL AND CANCER TISSUES

| <i>Normal tissue # sample</i> | <i>Tri S</i> | <i>NS6S</i> | <i>NS2S</i> | <i>NS</i> | <i>2S6S*</i> | <i>6S</i> | <i>2S</i> | <i>0S</i> |
|-------------------------------|--------------|-------------|-------------|-----------|--------------|-----------|-----------|-----------|
| 1                             | 23.71        | 2.65        | 7.45        | 21.23     | –            | 2.31      | 0.83      | 41.81     |
| 3                             | 6.71         | 1.24        | 14.36       | 26.24     | –            | 3.72      | 1.08      | 46.65     |
| 5                             | 13.31        | 3.81        | 13.49       | 22.14     | –            | 6.89      | 2.92      | 37.44     |
| 7                             | 12.15        | 4.69        | 16.33       | 21.38     | –            | 4.20      | 1.52      | 39.72     |
| 9                             | 16.16        | 5.55        | 13.59       | 19.50     | –            | 7.97      | 2.79      | 34.44     |
| 11                            | 8.05         | 3.87        | 20.93       | 21.66     | –            | 3.16      | 1.85      | 40.48     |
| 13                            | 18.84        | 5.80        | 10.47       | 23.15     | –            | 4.56      | 1.18      | 36.00     |
| 15                            | 9.07         | 3.58        | 21.63       | 22.18     | –            | 3.36      | 1.34      | 38.82     |
| 17                            | 18.34        | 4.75        | 10.70       | 16.72     | –            | 1.35      | 18.88     | 29.26     |
| 19                            | 7.49         | 2.12        | 11.18       | 23.73     | –            | 4.36      | 1.98      | 49.14     |
| Average                       | 13.38        | 3.81        | 14.01       | 21.79     | –            | 4.19      | 3.44      | 39.38     |
| Standard error                | 1.82         | 0.47        | 1.44        | 0.80      | –            | 0.63      | 1.73      | 1.82      |
| <i>Cancer tissue # sample</i> | <i>Tri S</i> | <i>NS6S</i> | <i>NS2S</i> | <i>NS</i> | <i>2S6S*</i> | <i>6S</i> | <i>2S</i> | <i>0S</i> |
| 2                             | 2.94         | 1.49        | 12.59       | 23.54     | –            | 3.49      | 0.68      | 55.27     |
| 4                             | 4.67         | 4.51        | 12.09       | 25.38     | –            | 7.11      | 1.36      | 44.89     |
| 6                             | 7.82         | 1.88        | 7.73        | 25.47     | –            | 4.44      | 0.90      | 51.77     |
| 8                             | 5.37         | 2.00        | 12.35       | 25.31     | –            | 8.63      | 2.40      | 43.95     |
| 10                            | 8.08         | 7.96        | 19.19       | 20.20     | –            | 5.97      | 0.80      | 37.80     |
| 12                            | 4.73         | 12.31       | 16.38       | 20.86     | –            | 7.67      | 0.64      | 37.42     |
| 14                            | 22.63        | 2.09        | 7.19        | 20.49     | –            | 4.91      | 1.20      | 41.49     |
| 16                            | 8.51         | 4.46        | 8.04        | 25.25     | –            | 7.75      | 1.08      | 44.91     |
| 18                            | 8.72         | 3.40        | 11.67       | 22.75     | –            | 4.87      | 1.07      | 47.51     |
| 20                            | 6.39         | 3.92        | 18.17       | 22.85     | –            | 6.10      | 0.86      | 41.71     |
| Average                       | 7.99         | 4.40        | 12.54       | 23.21     | –            | 6.09      | 1.10      | 44.67     |
| Standard error                | 1.74         | 1.07        | 1.35        | 0.67      | –            | 0.53      | 0.16      | 1.80      |

\*, not detected.
